# Supplementary material
Source: PubMed Central journal article supplement (PMC10046682)
Supplement: NIHMS1863760-supplement-Hensch_et__al___Supplemental_Figures.pdf [file NIHMS1863760-supplement-Hensch_et__al___Supplemental_Figures.pdf]

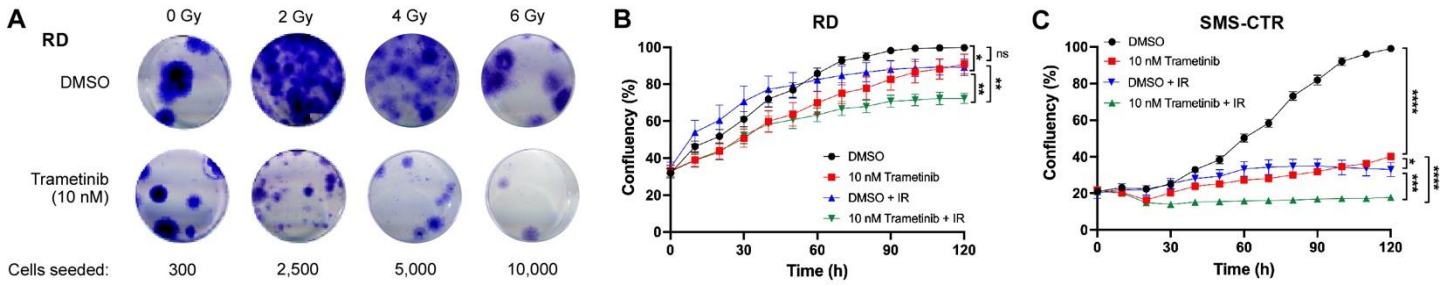

**Supplemental Figure 1.**

A. Representative colony formation wells from RD cells treated with DMSO or 10 nM trametinib then exposed to the indicated IR dose.

B, C. Average percent confluency of RD (B) and SMS-CTR (C) cells after DMSO and trametinib treatment, with and without IR exposure. Error bars represent  $\pm 1$  SD. \* $p < 0.05$ , \*\* $p < 0.01$ , \*\*\* $p < 0.001$ , \*\*\*\* $p < 0.0001$  by one-way ANOVA with Dunnett's multiple comparisons test.

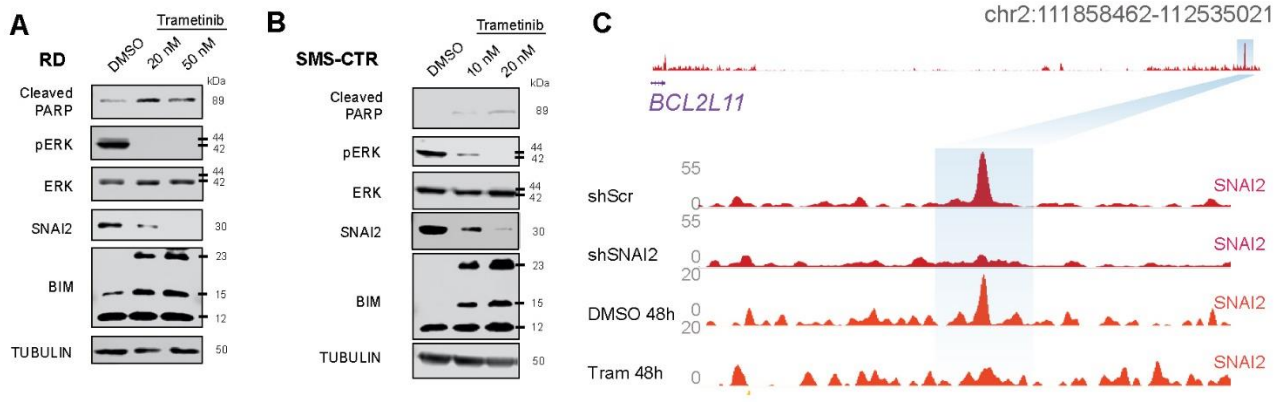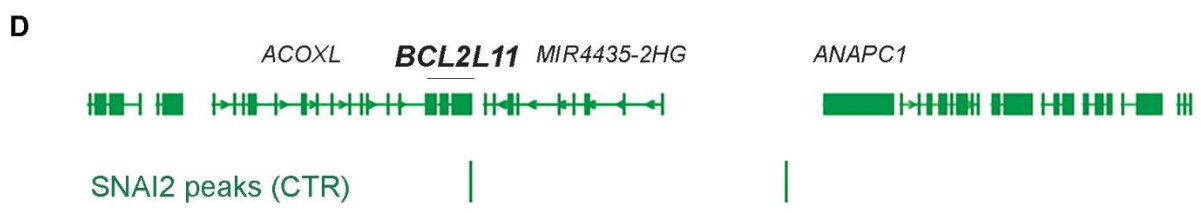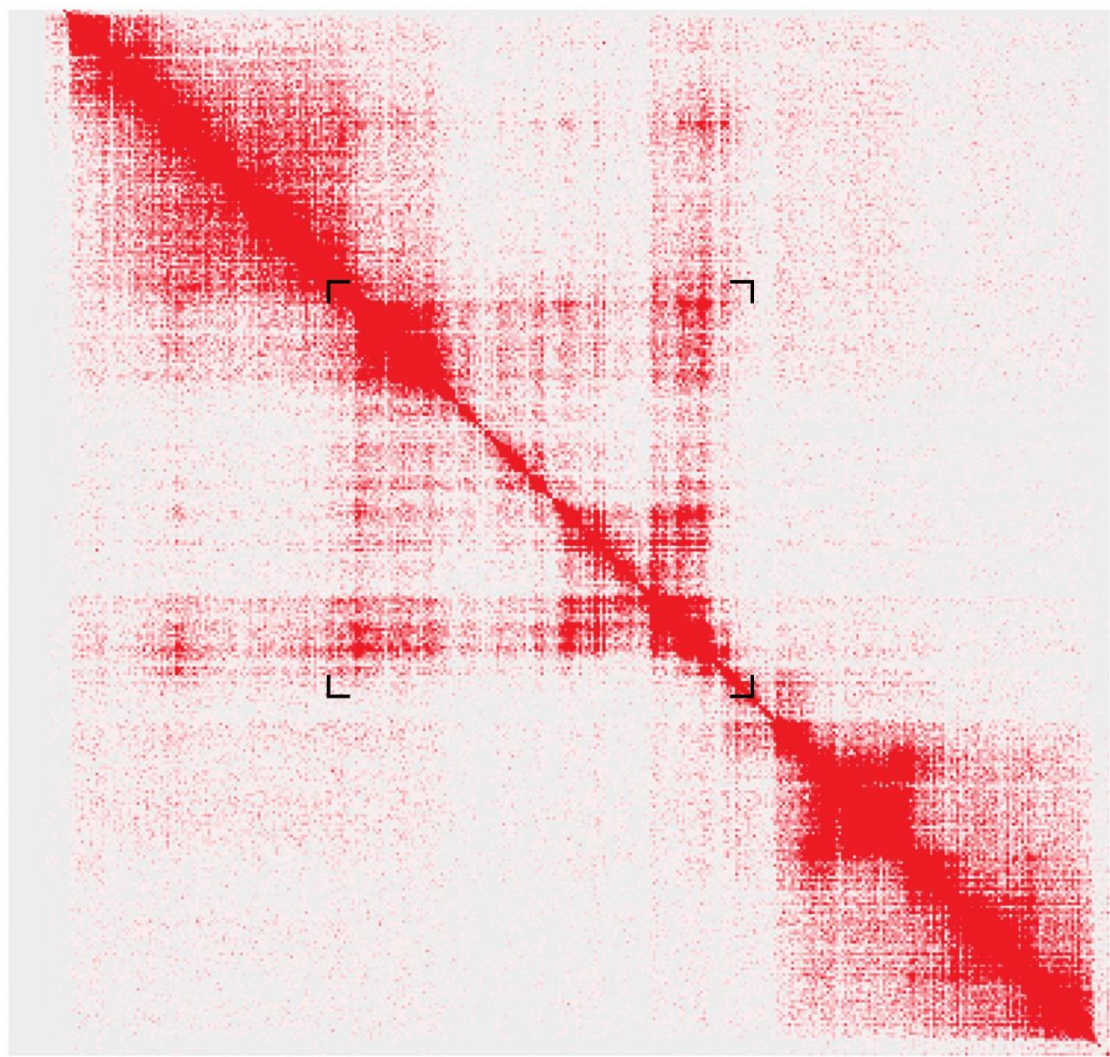

Chr2 111.4 - 113.2 MB

## Supplemental Figure 2.

A, B. Cleaved PARP, pERK, total ERK, SNAI2, and BIM protein expression immunoblots in DMSO- and trametinib-treated RD (A) and SMS-CTR (B) cells treated with DMSO and increasing doses of trametinib for 24h.

C. ChIP-seq SNAI2 binding peaks of the downstream enhancer region of *BCL2L1* in SMS-CTR cells treated with DMSO or trametinib (10 nM) for 48h, compared to SNAI2 binding peaks seen in RD shScr or shSNAI2 cells.

D. Topologically associated domain (TAD) for *BCL2L1/BIM* in IMR90 cells. Annotated in the image are the two SNAI2 bound distal *BCL2L1* enhancers.

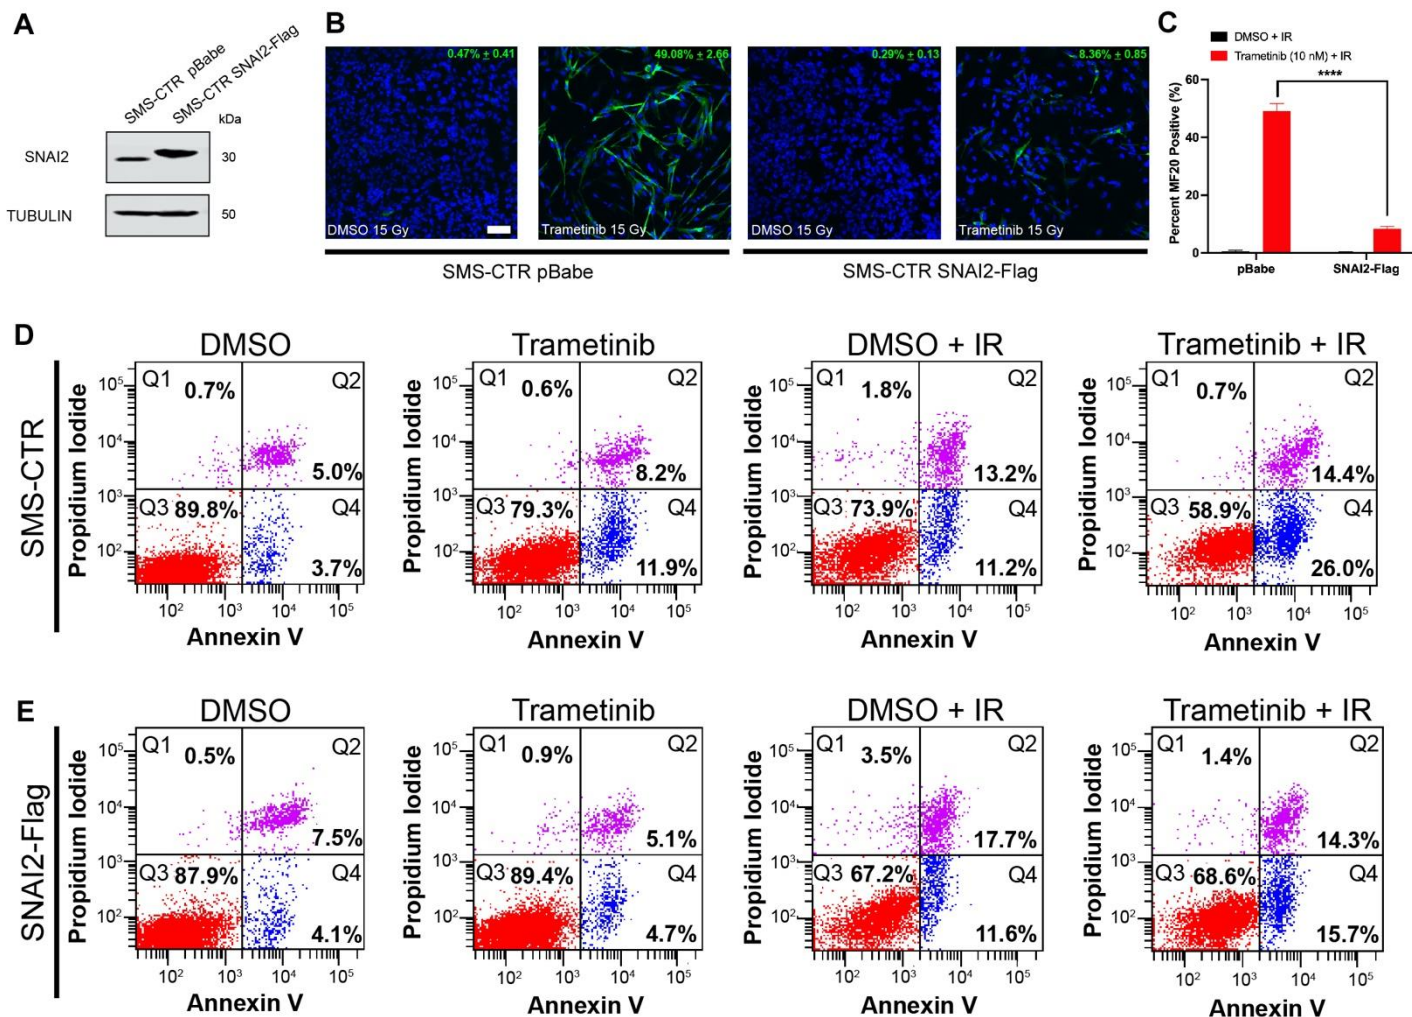

### Supplemental Figure 3.

A. SNAI2 protein expression in SMS-CTR pBabe and SNAI2-Flag overexpressing cell lines.

B. Representative confocal microscopy images of SMS-CTR pBabe and SNAI2-Flag cells treated with DMSO or trametinib after IR exposure, immunostained with myogenic differentiated myosin MF20 antibody. Scale bar = 100  $\mu$ m.

C. Quantification of average MF20-positive cells in DMSO- and trametinib-treated SMS-CTR pBabe and SNAI2-Flag cells after IR exposure. Error bars represent  $\pm 1$  SD. ns = not significant, \*\*\*\* $p < 0.0001$  by a two-way ANOVA with a posthoc Sidak's multiple comparison test.

D. Flow cytometry plots showing propidium iodide vs. annexin V staining of DMSO- and trametinib-treated SMS-CTR pBabe cells after non-IR and IR conditions.

E. Flow cytometry plots showing propidium iodide vs. annexin V staining of DMSO- and trametinib-treated SMS-CTR SNAI2-Flag cells after non-IR and IR conditions.



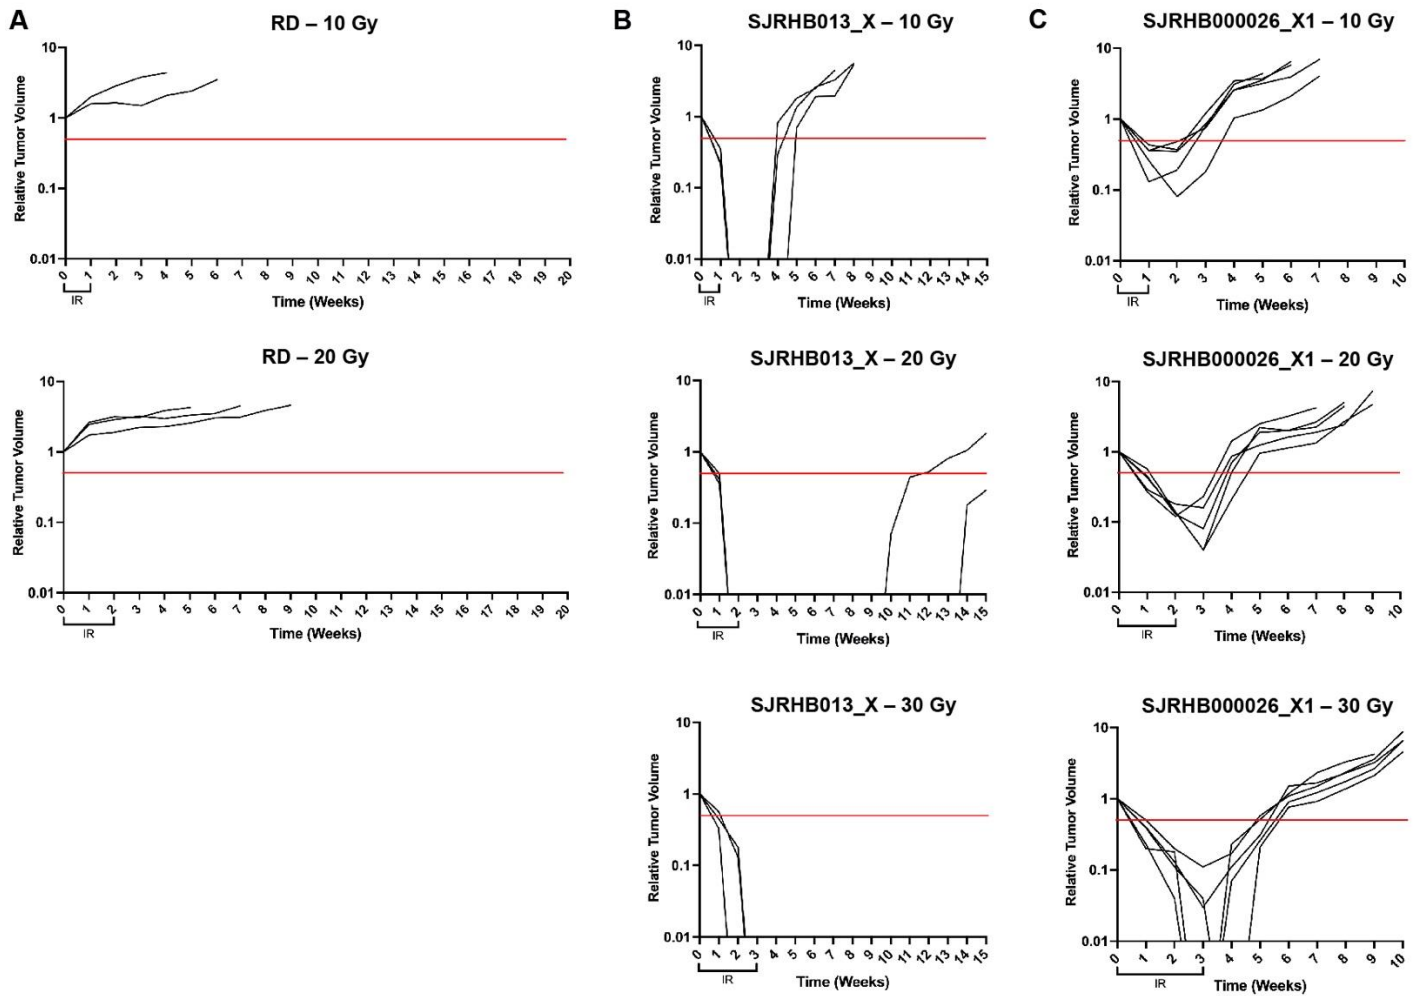

**Supplemental Figure 4.**

A–C. Relative tumor volume (RTV) of RD (A), SJRHB013\_X (B), and SJRHB000026\_X1 (C) tumors receiving increasing doses of IR (10–30 Gy) for IR sensitivity studies. Red line depicts 0.5 RTV.

**Supplemental Table 1.**

| <b>FN-RMS Cell Line</b> | <b>RAS Mutation</b>       | <b>p53 Status</b>      |
|-------------------------|---------------------------|------------------------|
| RD                      | NRAS <sup>Q61H</sup> (43) | R248W mutation (42)    |
| SMS-CTR                 | HRAS <sup>Q61K</sup> (43) | ΔNt 1236-1239 (42, 43) |
| Rh36                    | HRAS <sup>Q61K</sup> (43) | Wild type (43)         |
| <b>FN-RMS PDX</b>       |                           |                        |
| SJRHB013_X              | NRAS <sup>Q61K</sup> (40) | Wild type (40)         |
| SJRHB000026_X1          | HRAS <sup>G13R</sup> (40) | Wild type (40)         |

**Supplemental Table 2.**

| <b>REAGENT/RESOURCE</b>         | <b>SOURCE</b> | <b>IDENTIFIER</b>            |
|---------------------------------|---------------|------------------------------|
| phospho ERK                     | CST           | Cat# 4370, RRID:AB_2315112   |
| ERK                             | CST           | Cat# 9102, RRID:AB_330744    |
| Slug (C19G7)                    | CST           | Cat# 9585, RRID:AB_2239535   |
| SNAI1 (L70G2)                   | CST           | Cat# 3895s, RRID:AB_2191759  |
| BIM (C34C5)                     | CST           | Cat# 2933, RRID:AB_1030947   |
| Cleaved PARP (Asp214) (D64E10)  | CST           | Cat# 5625, RRID:AB_10699459  |
| GAPDH                           | CST           | Cat# 2118, RRID:AB_561053    |
| $\beta$ -Tubulin                | Abcam         | Cat# Ab6046, RRID:AB_2210370 |
| HRP anti-rabbit                 | CST           | Cat# 7074, RRID:AB_2099233   |
| HRP anti-mouse                  | GE Healthcare | Cat# NA93IV, RRID:AB_772210  |
| Myosin Heavy Chain (MF20)       | DSHB          | Cat# MF 20, RRID:AB_2147781  |
| Alexa Flour 488 goat anti-mouse | Invitrogen    | Cat# A11029, RRID:AB_138404  |
