# Supplementary material
Source: PubMed Central journal article supplement (PMC10046682)
Supplement: NIHMS1863760-supplement-Hensch_et_al___MCT-_Supplemental_Methods.pdf [file NIHMS1863760-supplement-Hensch_et_al___MCT-_Supplemental_Methods.pdf]

## Supplemental Materials and Methods

### Cell confluency assays

RD and SMS-CTR parental cells were pretreated with either DMSO or trametinib (10 nM for 72h or 20 nM for 24h) prior to being seeded into 48-well plates at 20-50% confluency and stored at 37° C in the Incucyte ZOOM (Essen Bioscience). After 24h, cells were subjected to varying degrees of IR (0 Gy or 15 Gy), began respective DMSO or trametinib (10 nM) treatment, and placed back in the Incucyte. Total confluency over time was monitored every 4–6 hours over a period of 5 days. Significance was calculated by one-way ANOVA with Dunnett's multiple comparisons tests.

### ChIP-seq

ChIP-seq tracks of antibodies targeting SNAI2 (CST, Catalogue # 9585), and H3K27ac (Active Motif, cat. #39133) were used for the current analysis (GEO datasets GSE137168, GSE85171) (14,19). ChIP-seq fastq files were mapped to human reference genome (hg19) using Bowtie2. High-confidence ChIP-seq peaks were called by MACS2 using default parameters and peaks were visualized using IGV viewer or epigenome browser.

### HiC

HiC chromatin interaction data from Rao et al. 2014 (45) was visualized using Juicebox. Data resolution at 5 kb and human genome version hg19. SNAI2 ChIP-seq peaks were derived from Pomela et al. 2021 GSE137168 (19).

### Supplemental References

41. Shukla N, Ameer N, Yilmaz I, Nafa K, Lau C-Y, Marchetti A, *et al.* Oncogene mutation profiling of pediatric solid tumors reveals significant subsets of embryonal rhabdomyosarcoma and neuroblastoma with mutated genes in growth signaling pathways. *Clinical cancer research : an official journal of the American Association for Cancer Research* **2012**;18(3):748-57 doi 10.1158/1078-0432.CCR-11-2056.
42. Felix CA, Kappel CC, Mitsudomi T, Nau MM, Tsokos M, Crouch GD, *et al.* Frequency and Diversity of p53 Mutations in Childhood Rhabdomyosarcoma. *Cancer Research* **1992**;52(8):2243.

43. Taylor AC, Shu L, Danks MK, Poquette CA, Shetty S, Thayer MJ, *et al.* P53 mutation and MDM2 amplification frequency in pediatric rhabdomyosarcoma tumors and cell lines. *Med Pediatr Oncol* **2000**;35(2):96-103 doi 10.1002/1096-911x(200008)35:2<96::aid-mpo2>3.0.co;2-z.
44. Renshaw J, Taylor KR, Bishop R, Valenti M, De Haven Brandon A, Gowan S, *et al.* Dual blockade of the PI3K/AKT/mTOR (AZD8055) and RAS/MEK/ERK (AZD6244) pathways synergistically inhibits rhabdomyosarcoma cell growth in vitro and in vivo. *Clin Cancer Res* **2013**;19(21):5940-51 doi 10.1158/1078-0432.CCR-13-0850.
45. Rao SS, Huntley MH, Durand NC, Stamenova EK, Bochkov ID, Robinson JT, *et al.* A 3D map of the human genome at kilobase resolution reveals principles of chromatin looping. *Cell* **2014**;159(7):1665-80 doi 10.1016/j.cell.2014.11.021.
